# Supplementary material for: Functional Genomics of Novel Secondary Metabolites from Diverse Cyanobacteria Using Untargeted Metabolomics
Source: Mar Drugs. 2013 Sep 30;11(10):3617–31. doi: 10.3390/md11103617 (PMC3826126; doi:10.3390/md11103617)
Supplement: Supplementary File 2 — Supplementary Information (PDF, 568 KB) [file marinedrugs-11-03617-s002.pdf]

# Supplementary Information

## Table of Contents

**Table S1**

**Table S2**

**Table S3**

**Table S4**

**Table S5**

**Figure S1**

**Figure S2**

**Figure S3**

**MS/MS data**

Separate xls file

Separate zip file

**Table S2.** Predicted ergothioneine biosynthesis genes across the genomes of analyzed cyanobacteria. No hercynylcysteine sulfoxide synthase (glutamine amidotransferase family protein) is found in the operon or elsewhere in the genome of *Synechococcus* PCC 7002. No ortholog of EgtE is present in any of the genomes; lyase reaction is probably catalyzed by another aminotransferase 5 family enzyme, although none is found in an operon with other ergothioneine synthesis genes. <sup>1</sup>—40% identity to N-terminal domain of *E. tasmaniensis* OvoA (ETA\_0030); <sup>2</sup>—no similarity to C-terminal domain of *E. tasmaniensis* OvoA (ETA\_0030), 47% identity to *M. smegmatis* EgtD (MSMEG\_6247).

| Genome                                   | IMG Gene ID | Locus Tag      | Gene Product<br>Name                          | Function                                                                       |
|------------------------------------------|-------------|----------------|-----------------------------------------------|--------------------------------------------------------------------------------|
| <i>Calothrix</i> sp.<br>PCC 7507         | 2505803781  | Cal7507_5459   | Sulphatase-<br>modifying factor<br>protein    | predicted<br>5-histidylcysteine<br>sulfoxide synthase <sup>1</sup>             |
| <i>Calothrix</i> sp.<br>PCC 7507         | 2505803782  | Cal7507_5460   | methyltransferase                             | predicted<br>5-histidylcysteine<br>sulfoxide<br>methyltransferase <sup>2</sup> |
| <i>Chroococcidiopsis</i><br>sp. PCC 6712 | 2505784276  | Chr6712_0536   | methyltransferase                             | hercynine synthase                                                             |
| <i>Chroococcidiopsis</i><br>sp. PCC 6712 | 2505785000  | Chr6712_1252   | Conserved<br>hypothetical protein<br>CHP03440 | hercynyl-gamma-<br>glutamylcysteine<br>sulfoxide synthase                      |
| <i>Chroococcidiopsis</i><br>sp. PCC 6712 | 2505785001  | Chr6712_1253   | Conserved<br>hypothetical protein<br>CHP03442 | hercynylcysteine<br>sulfoxide synthase                                         |
| <i>Geitlerinema</i> sp.<br>PCC 7407      | 2503605984  | GEI7407_0022   | methyltransferase                             | hercynine synthase                                                             |
| <i>Geitlerinema</i> sp.<br>PCC 7407      | 2503605985  | GEI7407_0023   | protein of unknown<br>function DUF323         | hercynyl-gamma-<br>glutamylcysteine<br>sulfoxide synthase                      |
| <i>Geitlerinema</i> sp.<br>PCC 7407      | 2503605986  | GEI7407_0024   | glutamine<br>amidotransferase<br>class-II     | hercynylcysteine<br>sulfoxide synthase                                         |
| <i>Halothece</i> sp.<br>PCC 7418         | 2503638506  | PCC7418_3752   | methyltransferase                             | hercynine synthase                                                             |
| <i>Halothece</i> sp.<br>PCC 7418         | 2503636330  | PCC7418_1605   | protein of unknown<br>function DUF323         | hercynyl-gamma-<br>glutamylcysteine<br>sulfoxide synthase                      |
| <i>Halothece</i> sp.<br>PCC 7418         | 2503636329  | PCC7418_1604   | glutamine<br>amidotransferase<br>class-II     | hercynylcysteine<br>sulfoxide synthase                                         |
| <i>Leptolyngbya</i> sp.<br>PCC 7376      | 2503885948  | Lepto7376_0353 | methyltransferase                             | hercynine synthase                                                             |

Table S2. Cont.

|                                                    |            |                              |                                                                              |                                                           |
|----------------------------------------------------|------------|------------------------------|------------------------------------------------------------------------------|-----------------------------------------------------------|
| <i>Leptolyngbya</i> sp.<br>PCC 7376                | 2503886757 | Lepto7376_1155               | Conserved<br>hypothetical protein<br>CHP03440                                | hercynyl-gamma-<br>glutamylcysteine<br>sulfoxide synthase |
| <i>Leptolyngbya</i> sp.<br>PCC 7376                | 2503886756 | Lepto7376_1154               | Conserved<br>hypothetical protein<br>CHP03442                                | hercynylcysteine<br>sulfoxide synthase                    |
| <i>Microcoleus</i><br><i>vaginatus</i><br>PCC 9802 | 2505165825 | Mvag_PCC9802_DRAFT2_00002240 | probable<br>methyltransferase                                                | hercynine synthase                                        |
| <i>Microcoleus</i><br><i>vaginatus</i><br>PCC 9802 | 2505165824 | Mvag_PCC9802_DRAFT2_00002230 | TIGR03440 family<br>protein                                                  | hercynyl-gamma-<br>glutamylcysteine<br>sulfoxide synthase |
| <i>Microcoleus</i><br><i>vaginatus</i><br>PCC 9802 | 2505165823 | Mvag_PCC9802_DRAFT2_00002220 | TIGR03442 family<br>protein                                                  | hercynylcysteine<br>sulfoxide synthase                    |
| <i>Nostoc</i> sp.<br>PCC 7107                      | 2503739909 | Nos7107_1277                 | methyltransferase                                                            | hercynine synthase                                        |
| <i>Nostoc</i> sp.<br>PCC 7107                      | 2503739910 | Nos7107_1278                 | Conserved<br>hypothetical protein<br>CHP03440                                | hercynyl-gamma-<br>glutamylcysteine<br>sulfoxide synthase |
| <i>Nostoc</i> sp.<br>PCC 7107                      | 2503739911 | Nos7107_1279                 | Conserved<br>hypothetical protein<br>CHP03442                                | hercynylcysteine<br>sulfoxide synthase                    |
| <i>Pleurocapsa</i> sp.<br>PCC 7327                 | 2509575893 | Ple7327_4010                 | probable<br>methyltransferase                                                | hercynine synthase                                        |
| <i>Pleurocapsa</i> sp.<br>PCC 7327                 | 2509576015 | Ple7327_4133                 | TIGR03440 family<br>protein                                                  | hercynyl-gamma-<br>glutamylcysteine<br>sulfoxide synthase |
| <i>Pleurocapsa</i> sp.<br>PCC 7327                 | 2509576019 | Ple7327_4137                 | TIGR03442 family<br>protein                                                  | hercynylcysteine<br>sulfoxide synthase                    |
| <i>Synechococcus</i> sp.<br>PCC 7002               | 641610000  | SYNPCC7002_G0154             | hypothetical protein                                                         | hercynine synthase                                        |
| <i>Synechococcus</i> sp.<br>PCC 7002               | 641610001  | SYNPCC7002_G0155             | conserved<br>hypothetical protein,<br>domain of unknown<br>function (DUF323) | hercynyl-gamma-<br>glutamylcysteine<br>sulfoxide synthase |

**Table S3.** Predicted glucosylglycerol biosynthesis genes across the ten analyzed cyanobacteria.

| Genome                                   | IMG Gene ID | Locus Tag        | Gene Product Name                     | Function                                 |
|------------------------------------------|-------------|------------------|---------------------------------------|------------------------------------------|
| <i>Chroococcidiopsis</i> sp.<br>PCC 6712 | 2505786553  | Chr6712_2792     | glucosylglycerol-phosphate synthase   | glucosylglycerol-phosphate synthase      |
| <i>Chroococcidiopsis</i> sp.<br>PCC 6712 | 2505787835  | Chr6712_4056     | glucosylglycerol 3-phosphatase        | glucosylglycerol 3-phosphatase           |
| <i>Halotheca</i> sp.<br>PCC 7418         | 2503634797  | PCC7418_0098     | glucosylglycerol-phosphate synthase   | glucosylglycerol-phosphate synthase      |
| <i>Halotheca</i> sp.<br>PCC 7418         | 2503637004  | PCC7418_2274     | glucosylglycerol 3-phosphatase        | glucosylglycerol 3-phosphatase           |
| <i>Leptolyngbya</i> sp.<br>PCC 7376      | 2503886392  | Lepto7376_0792   | glucosylglycerol-phosphate synthase   | glucosylglycerol-phosphate synthase      |
| <i>Leptolyngbya</i> sp.<br>PCC 7376      | 2503886396  | Lepto7376_0796   | glucosylglycerol 3-phosphatase        | glucosylglycerol 3-phosphatase           |
| <i>Synechococcus</i> sp.<br>PCC 7002     | 641612860   | SYNPCC7002_A2851 | glucosylglycerol-phosphate synthase   | glucosylglycerol-phosphate synthase      |
| <i>Synechococcus</i> sp.<br>PCC 7002     | 641612851   | SYNPCC7002_A2841 | glucosylglycerol 3-phosphatase        | glucosylglycerol 3-phosphatase           |
| <i>Geitlerinema</i> sp.<br>PCC 7407      | 2503608226  | GEI7407_2224     | glucosylglycerol-phosphate synthase   | glucosylglycerol-phosphate synthase      |
| <i>Geitlerinema</i> sp.<br>PCC 7407      | 2503608225  | GEI7407_2223     | sucrose-6F-phosphate phosphohydrolase | predicted glucosylglycerol 3-phosphatase |

**Table S4.** Predicted glucosylglycerate biosynthesis genes across the ten analyzed cyanobacteria.

| Genome                                | IMG Gene ID | Locus Tag        | Gene Product Name                              | Function                                |
|---------------------------------------|-------------|------------------|------------------------------------------------|-----------------------------------------|
| <i>Chroococcidiopsis</i> sp. PCC 6712 | 2505788254  | Chr6712_4470     | cell wall biogenesis glycosyltransferase       | glucosyl-3-phosphoglycerate synthase    |
| <i>Chroococcidiopsis</i> sp. PCC 6712 | 2505788418  | Chr6712_4632     | mannosyl-3-phosphoglycerate phosphatase family | glucosyl-3-phosphoglycerate phosphatase |
| <i>Leptolyngbya</i> sp. PCC 7376      | 2503885969  | Lepto7376_0374   | hypothetical protein                           | glucosyl-3-phosphoglycerate synthase    |
| <i>Leptolyngbya</i> sp. PCC 7376      | 2503885971  | Lepto7376_0376   | mannosyl-3-phosphoglycerate phosphatase family | glucosyl-3-phosphoglycerate phosphatase |
| <i>Pleurocapsa</i> sp. PCC 7327       | 2509573393  | Ple7327_1510     | hypothetical protein                           | glucosyl-3-phosphoglycerate synthase    |
| <i>Pleurocapsa</i> sp. PCC 7327       | 2509576101  | Ple7327_4219     | HAD-superfamily hydrolase, subfamily IIB       | glucosyl-3-phosphoglycerate phosphatase |
| <i>Synechococcus</i> sp. PCC 7002     | 641612031   | SYNPCC7002_A2021 | hypothetical protein                           | glucosyl-3-phosphoglycerate synthase    |
| <i>Synechococcus</i> sp. PCC 7002     | 641612033   | SYNPCC7002_A2023 | putative hydrolase, HAD superfamily protein    | glucosyl-3-phosphoglycerate phosphatase |

**Table S5.** Predicted gamma-glutamyltransferases and gamma-glutamyltransferase-like genes across the ten analyzed cyanobacteria.

| Genome                                  | IMG Gene ID | Locus Tag                    | Product Name                           | Protein family assignment |
|-----------------------------------------|-------------|------------------------------|----------------------------------------|---------------------------|
| <i>Calothrix</i> sp. PCC 7507           | 2505801690  | Cal7507_3414                 | Gamma-glutamyltransferase              | COG0405, pfam01019        |
| <i>Chroococcidiopsis</i> sp. PCC 6712   | 2505787521  | Chr6712_3744                 | gamma-glutamyltransferase              | COG0405, pfam01019        |
| <i>Geitlerinema</i> sp. PCC 7407        | 2503609724  | GEI7407_3705                 | gamma-glutamyltransferase              | COG0405, pfam01019        |
| <i>Halotheca</i> sp. PCC 7418           | 2503637006  | PCC7418_2276                 | Gamma-glutamyltransferase              | COG0405, pfam01019        |
| <i>Microcoleus vaginatus</i> PCC 9802   | 2505170787  | Mvag_PCC9802_DRAFT2_00051890 | gamma-glutamyltranspeptidase           | COG0405, pfam01019        |
| <i>Nostoc</i> sp. PCC 7107              | 2503740642  | Nos7107_2002                 | gamma-glutamyltransferase              | COG0405, pfam01019        |
| <i>Pleurocapsa</i> sp. PCC 7327         | 2509572868  | Ple7327_0985                 | gamma-glutamyltranspeptidase           | COG0405, pfam01019        |
| <i>Pleurocapsa</i> sp. PCC 7327         | 2509573859  | Ple7327_1976                 | Gamma-glutamyltransferase              | COG0405, pfam01019        |
| <i>Pleurocapsa</i> sp. PCC 7327         | 2509574431  | Ple7327_2548                 | gamma-glutamyltranspeptidase           | COG0405, pfam01019        |
| <i>Synechococcus elongatus</i> PCC 6301 | 637616990   | syc1325_c                    | gamma-glutamyltranspeptidase           | COG0405, pfam01019        |
| <i>Synechococcus</i> sp. PCC 7002       | 641609980   | SYNPCC7002_G0134             | Gamma-glutamyltranspeptidase precursor | COG0405, pfam01019        |

**Figure S1.** Positive mode MS/MS spectra of putative betaines listed in Figure 2 of the main text (collision energy 10 V).

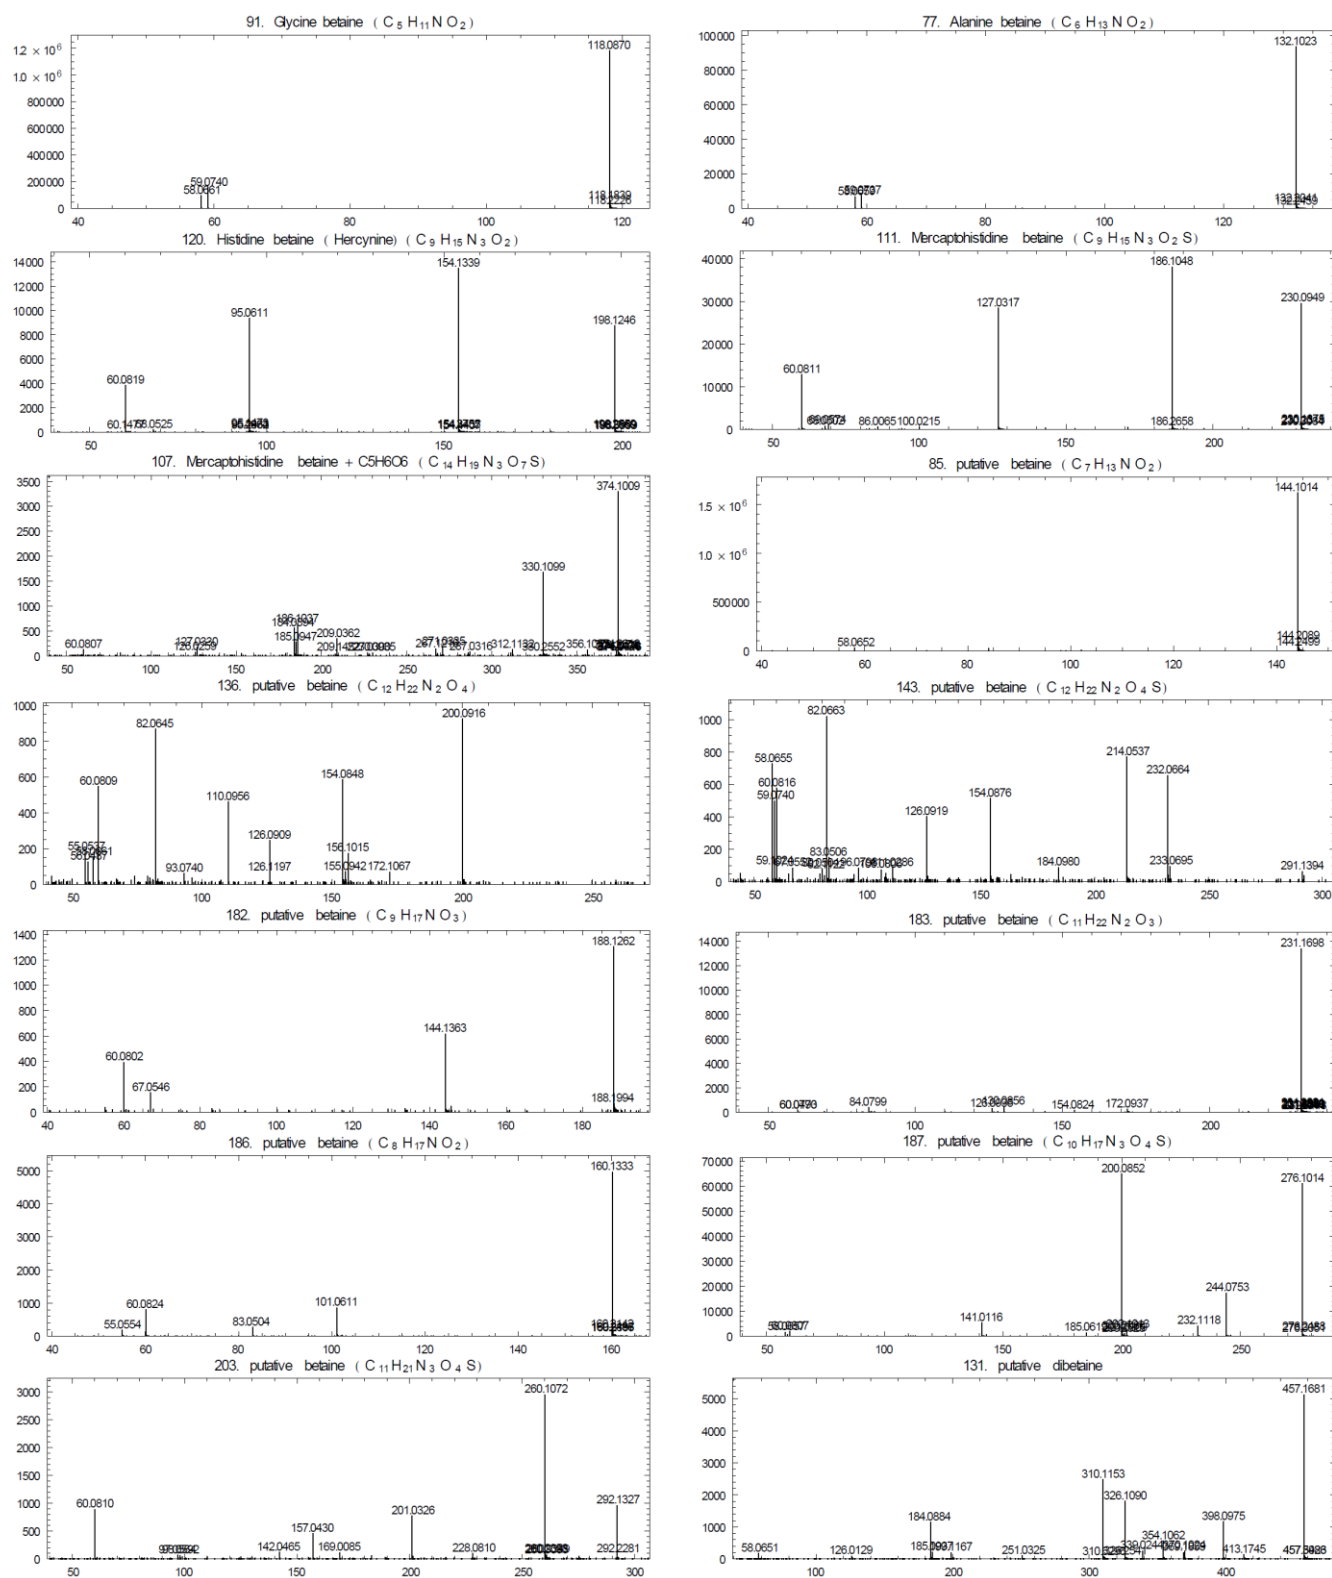



## References

1. Larkin, M.A.; Blackshields, G.; Brown, N.P.; Chenna, R.; McGettigan, P.A.; McWilliam, H.; Valentin, F.; Wallace, I.M.; Wilm, A.; Lopez, R.; *et al.* Clustal W and Clustal X version 2.0. *Bioinformatics* **2007**, *23*, 2947–2948.
2. Waterhouse, A.M.; Procter, J.B.; Martin, D.M.; Clamp, M.; Barton, G.J. Jalview Version 2—a multiple sequence alignment editor and analysis workbench. *Bioinformatics* **2009**, *25*, 1189–1191.

© 2013 by the authors; licensee MDPI, Basel, Switzerland. This article is an open access article distributed under the terms and conditions of the Creative Commons Attribution license (<http://creativecommons.org/licenses/by/3.0/>).
